# Supplementary material for: Synthesis of Bioactive Microcapsules Using a Microfluidic Device
Source: PubMed Central journal article supplement (PMC3472820; doi:10.3390/s120810136), 2012-07-26

*Supplementary Information*

## **Synthesis of Bioactive Microcapsules Using a Microfluidic Device. *Sensors* 2012, 12, 10136–10147**

**Byeong Il Kim<sup>1,2,†</sup>, Soon Woo Jeong<sup>1,2,†</sup>, Kyoung G. Lee<sup>1</sup>, Tae Jung Park<sup>3</sup>, Jung Youn Park<sup>4</sup>,  
Jae Jun Song<sup>5</sup>, Seok Jae Lee<sup>1,\*</sup> and Chang-Soo Lee<sup>2,\*</sup>**

<sup>1</sup> Center for Nanobio Integration & Convergence Engineering (NICE), National Nanofab Center, 291 Daehak-ro, Yuseong-gu, Daejeon 305-806, Korea; E-Mails: kbiset@nnfc.re.kr (B.I.K.); swjeong@nnfc.re.kr (S.W.J.); kglee@nnfc.re.kr (K.G.L.)

<sup>2</sup> Department of Chemical Engineering, Chungnam National University, 220 Gung-Dong, Yuseong-gu, Daejeon 305-764, Korea

<sup>3</sup> Department of Chemistry, Chung-Ang University, 84 Heukseok-ro, Dongjak-gu, Seoul 156-756, Korea; E-Mail: tjpark@cau.ac.kr

<sup>4</sup> Biotechnology Research Division, National Fisheries Research & Development Institute (NFRDI), 408-1 Sirang-ri, Gijang, Busan 619-705, Korea; E-Mail: jypark@nfrdi.go.kr

<sup>5</sup> Microbe-based Fusion Technology Research Center, KRIBB, 1404 Sinjeong-dong, Jeongeup, Jeonbuk 580-185, Korea; E-Mail: jjsong@kribb.re.kr

† These authors contributed equally to this work.

\* Authors to whom correspondence should be addressed; E-Mails: sjlee@nnfc.re.kr (S.J.L.); rhadum@cnu.ac.kr (C.-S.L.); Tel.: +82-42-879-9722 (S.J.L.); Fax: +82-42-879-9609 (S.J.L.); Tel.: +82-42-821-5896 (C.-S.L.); +82-42-822-8995 (C.-S.L.).

*Received: 8 June 2012; in revised form: 4 July 2012 / Accepted: 18 July 2012 /*

*Published: 26 July 2012*

---

**Figure S1.** (A) Schematic illustration of microfluidic device and its dimensions; (B) Photograph of microfluidic device.

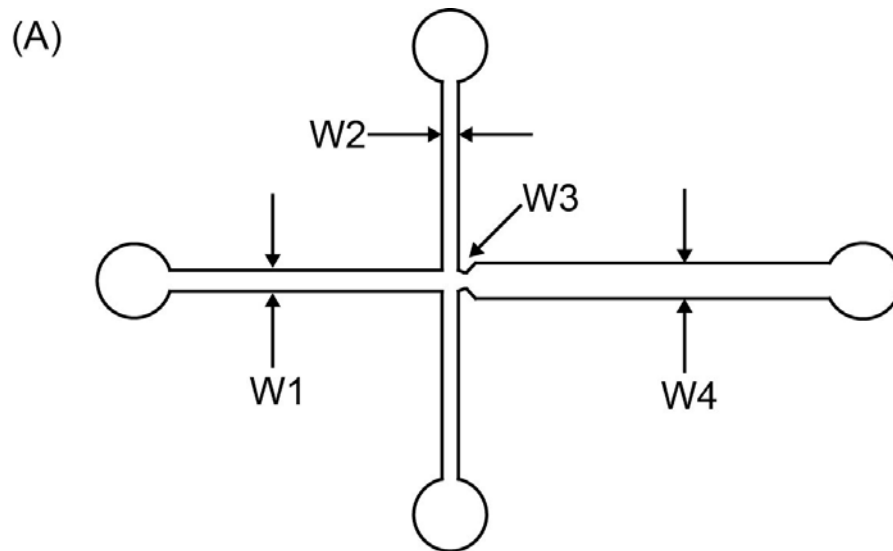

Dimensions

$W1=180\ \mu\text{m}$ ,  $W2=280\ \mu\text{m}$ ,  $W3=50\ \mu\text{m}$ ,  $W4=580\ \mu\text{m}$ ,  
Channel Height= $100\ \mu\text{m}$

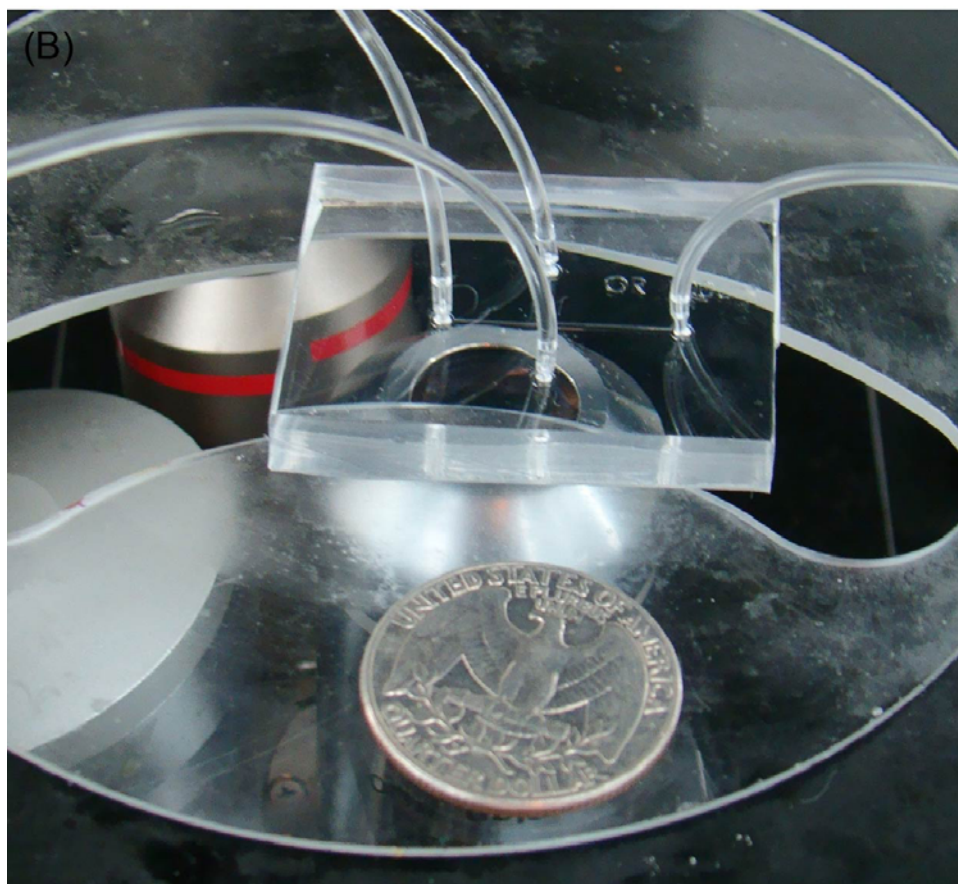

**Figure S2.** Photomicrographs showing the droplets of different sizes at the fixed DP (1  $\mu\text{L}/\text{min}$ ) with five different flow rates of CP. (A)  $Q_{\text{CP}1} = 1 \mu\text{L}/\text{min}$ ; (B)  $Q_{\text{CP}2} = 2 \mu\text{L}/\text{min}$ ; (C)  $Q_{\text{CP}3} = 3 \mu\text{L}/\text{min}$ ; (D)  $Q_{\text{CP}4} = 4 \mu\text{L}/\text{min}$ ; (E)  $Q_{\text{CP}5} = 5 \mu\text{L}/\text{min}$ . All scale bars are 500  $\mu\text{m}$ .

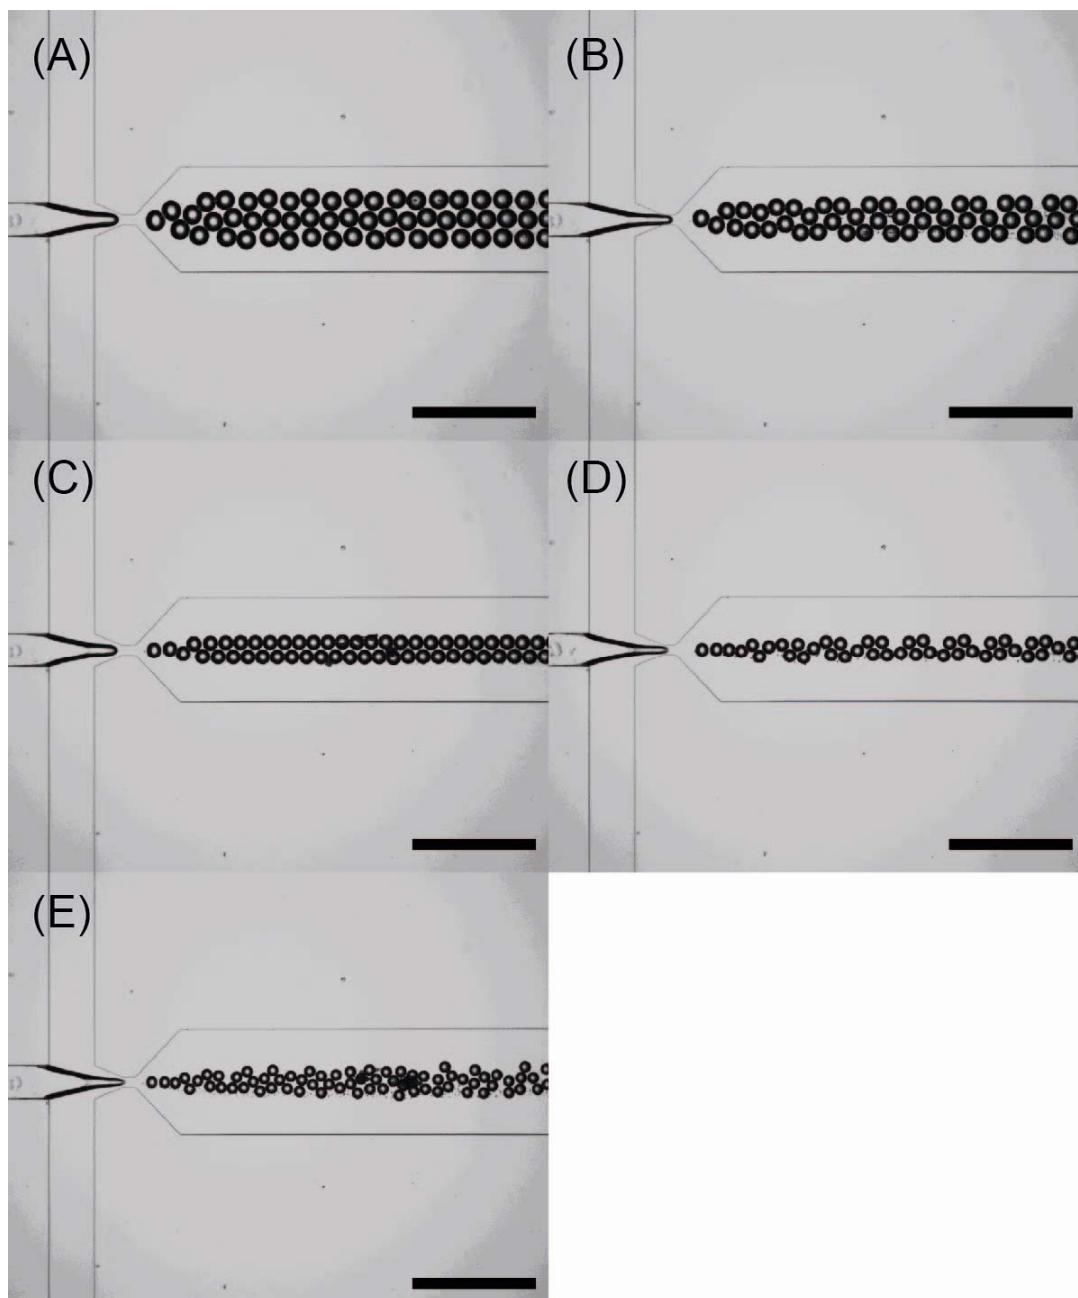

**Figure S3.** Photomicrographs showing the droplets of different sizes at the fixed DP (2  $\mu\text{L}/\text{min}$ ) with five different flow rates of CP. (A)  $Q_{\text{CP1}} = 1 \mu\text{L}/\text{min}$ ; (B)  $Q_{\text{CP2}} = 2 \mu\text{L}/\text{min}$ ; (C)  $Q_{\text{CP3}} = 3 \mu\text{L}/\text{min}$ ; (D)  $Q_{\text{CP4}} = 4 \mu\text{L}/\text{min}$ ; (E)  $Q_{\text{CP5}} = 5 \mu\text{L}/\text{min}$ . All scale bars are 500  $\mu\text{m}$ .

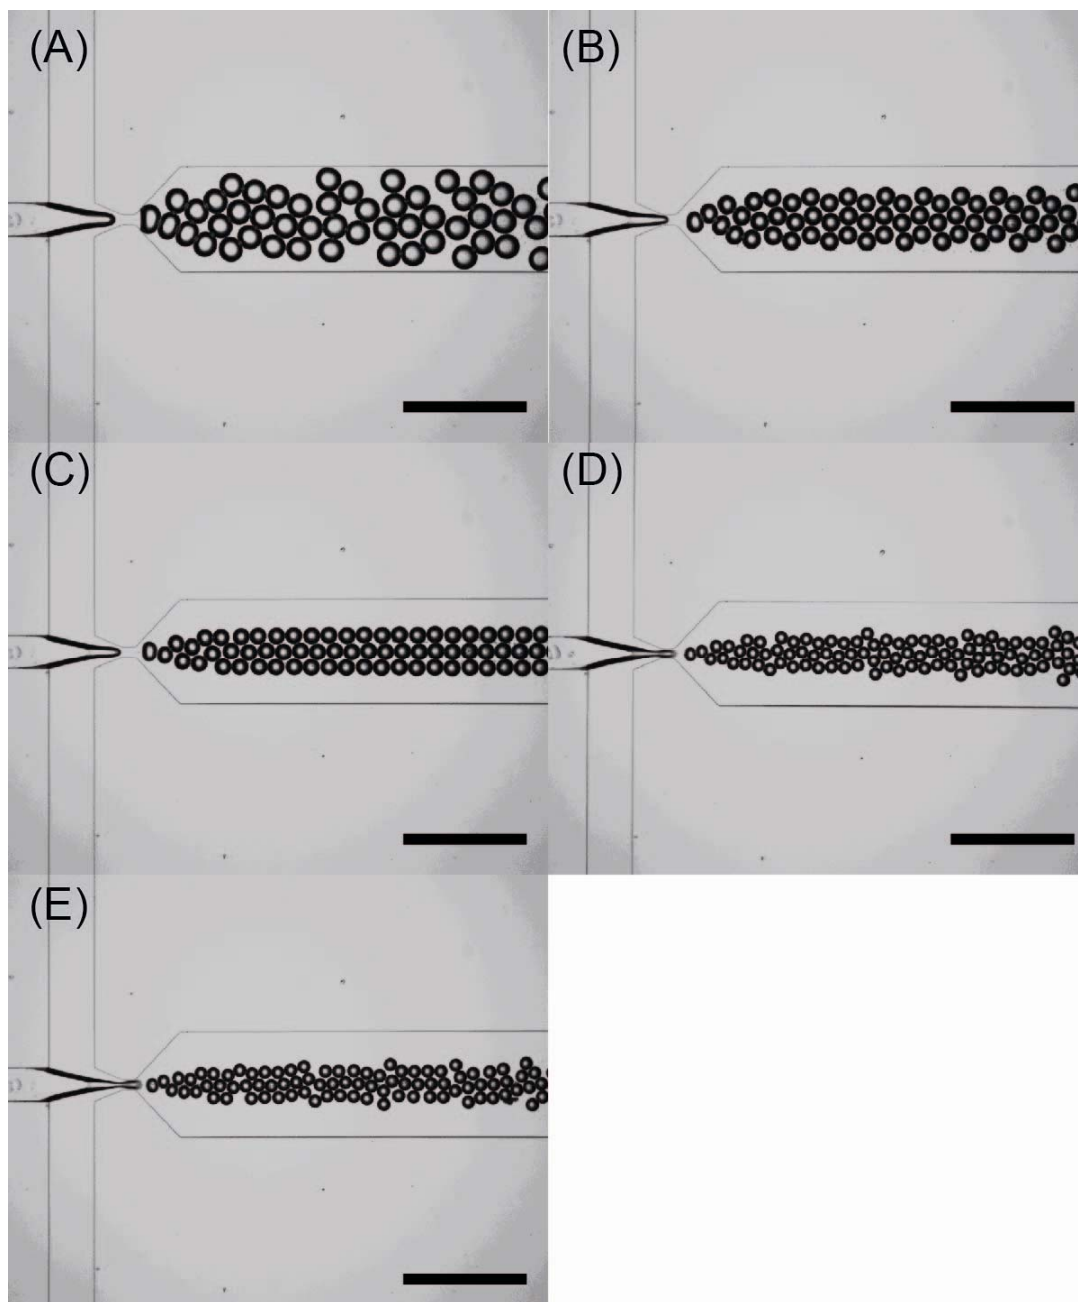

**Figure S4.** Photomicrographs showing the droplets of different sizes at the fixed DP ( $3 \mu\text{L}/\text{min}$ ) with five different flow rates of CP. **(A)**  $Q_{\text{CP1}} = 1 \mu\text{L}/\text{min}$ ; **(B)**  $Q_{\text{CP2}} = 2 \mu\text{L}/\text{min}$ ; **(C)**  $Q_{\text{CP3}} = 3 \mu\text{L}/\text{min}$ ; **(D)**  $Q_{\text{CP4}} = 4 \mu\text{L}/\text{min}$ ; **(E)**  $Q_{\text{CP5}} = 5 \mu\text{L}/\text{min}$ . All scale bars are  $500 \mu\text{m}$ .

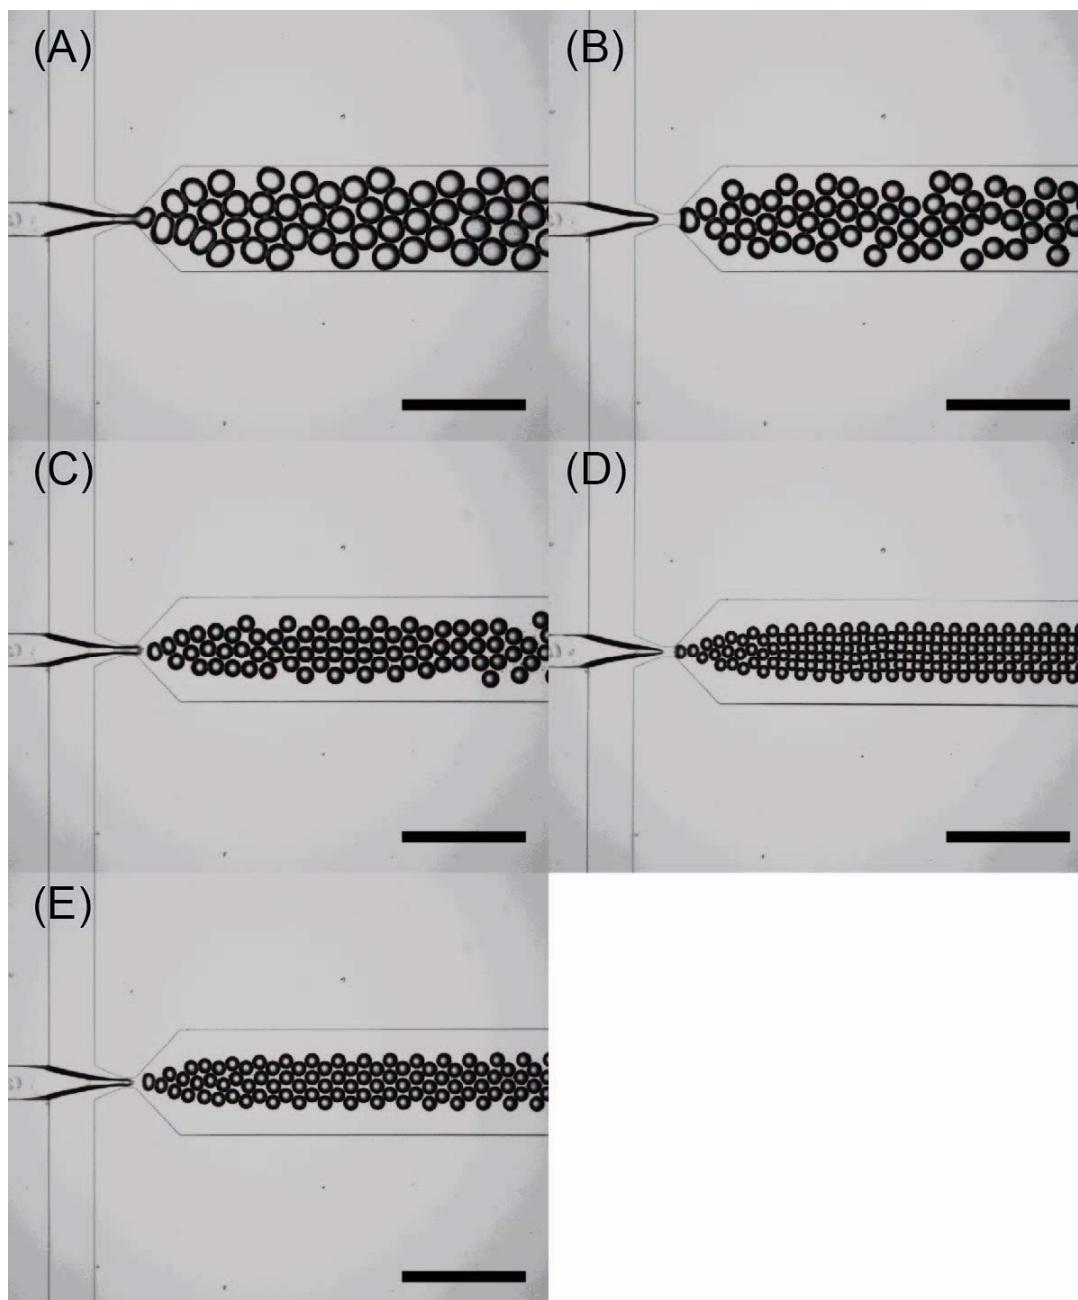

**Figure S5.** Photomicrographs showing the droplets of different sizes at the fixed DP (4  $\mu\text{L}/\text{min}$ ) with five different flow rates of CP. (A)  $Q_{\text{CP1}} = 1 \mu\text{L}/\text{min}$ ; (B)  $Q_{\text{CP2}} = 2 \mu\text{L}/\text{min}$ ; (C)  $Q_{\text{CP3}} = 3 \mu\text{L}/\text{min}$ ; (D)  $Q_{\text{CP4}} = 4 \mu\text{L}/\text{min}$ ; (E)  $Q_{\text{CP5}} = 5 \mu\text{L}/\text{min}$ . All scale bars are 500  $\mu\text{m}$ .

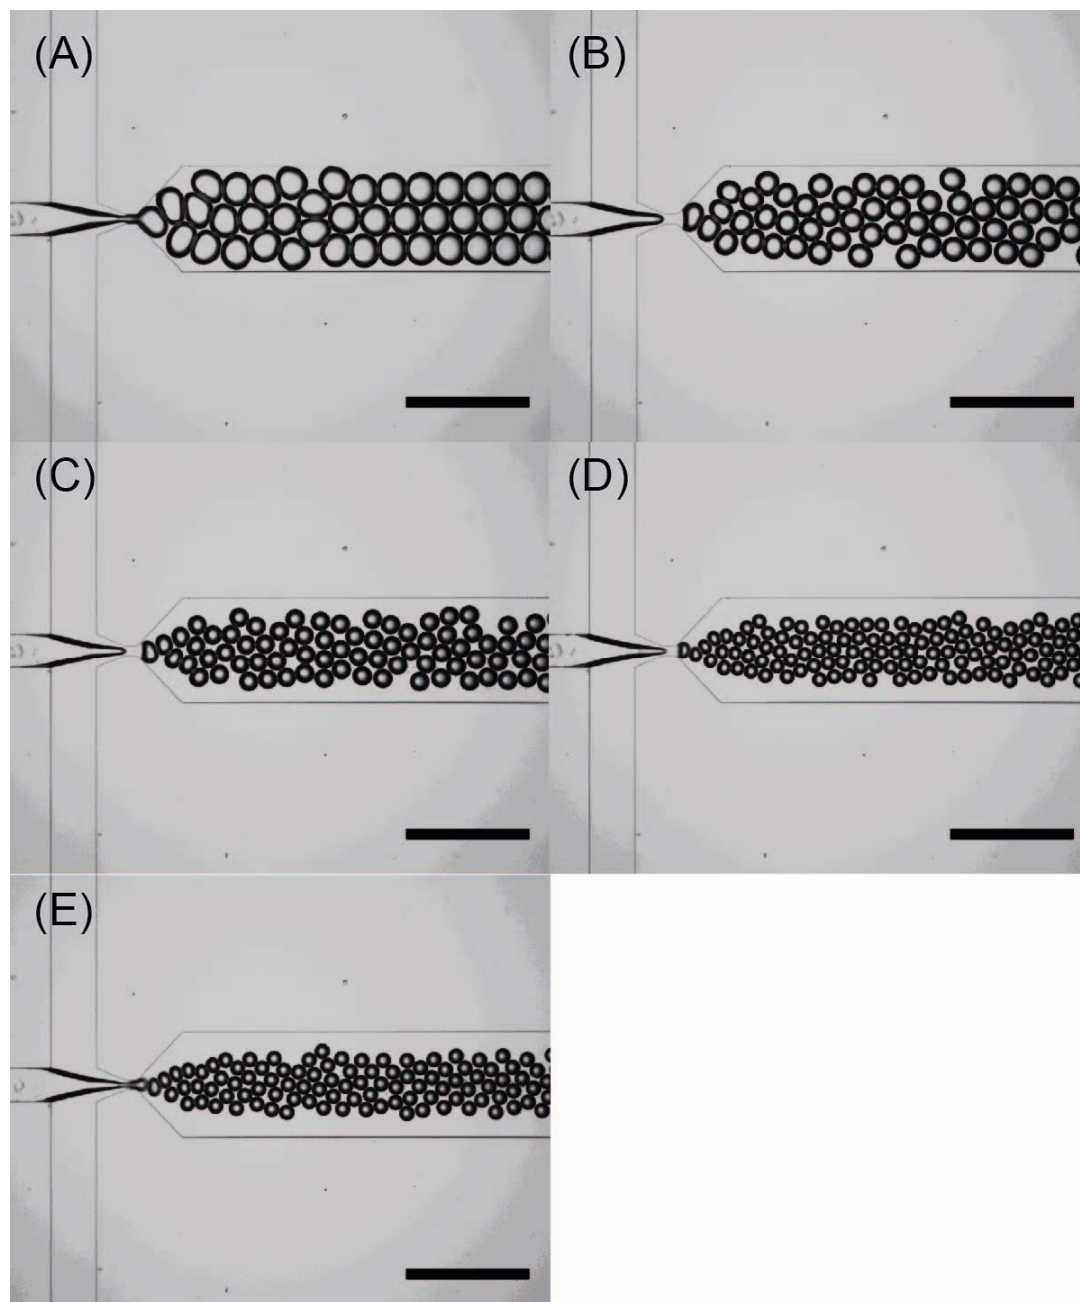

Supplement: sensors-12-10136-s001.pdf [file sensors-12-10136-s001.pdf]
